# Supplementary material for: The response of head and neck squamous cell carcinoma to cetuximab treatment depends on Aurora kinase A polymorphism
Source: PubMed Central journal article supplement (PMC4170642; doi:10.18632/oncotarget.2117), 2014-06-18
Supplement: oncotarget-05-5428-s001.pdf [file oncotarget-05-5428-s001.pdf]

# The response of head and neck squamous cell carcinoma to cetuximab treatment depends on Aurora kinase A polymorphism

## Supplementary Material

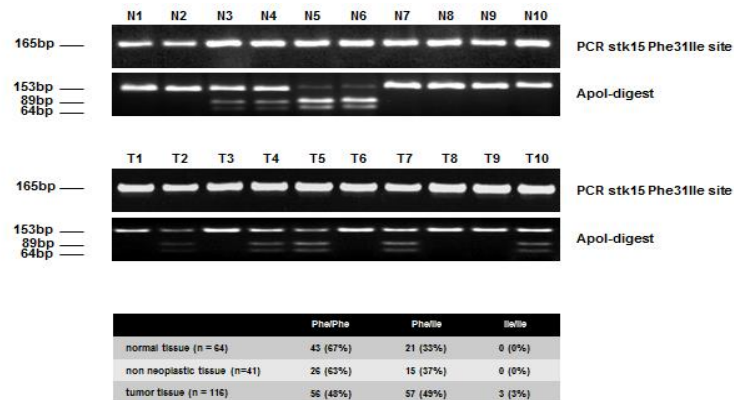

**Suppl. 1:** The distribution of Aurka/STK15 codon 91 homo- and heterozygosity was determined in normal, non-neoplastic, and tumour tissues.

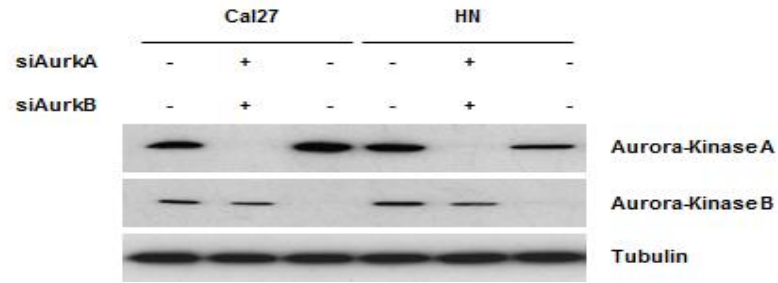

**Suppl. 2:** The siRNA-mediated knockdown of Aurora kinases A and B was highly effective, as determined by the protein expression levels of the respective kinase.

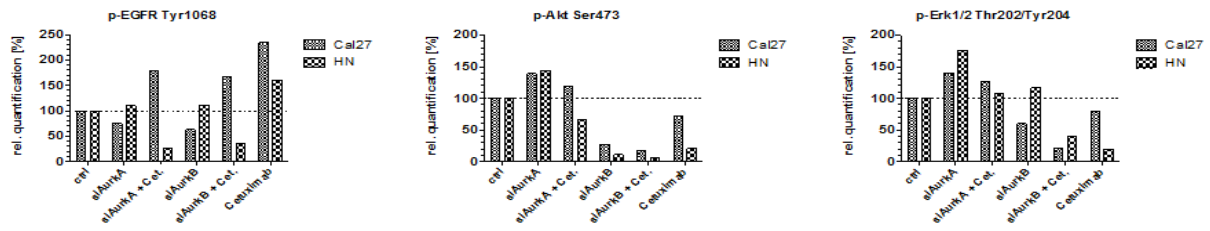

**Suppl. 3: Shown is the relative quantification of western blot analyses.** The EGFR, Akt, and Erk1/2 expression levels were not affected by any of the treatments. Cetuximab caused a marked increase in the phosphorylation of its target in the Cal27 but not the HN cells. Akt phosphorylation decreased after AurkB knockdown in both cell lines. Erk1/2 phosphorylation decreased after AurkB knockdown in the Cal27 cells, in both the presence and absence of cetuximab.
